# Supplementary material for: Mesoporous gold nanospheres via thiolate–Au(i) intermediates
Source: Royal Society of Chemistry journal article supplement (doi:10.1039/c9sc01728c), 2019-01-01
Supplement: c9sc01728c1.pdf [file c9sc01728c1.pdf]

**Electronic Supplementary Information (ESI)**

**Mesoporous gold nanospheres *via* thiolate-Au(I) intermediates**

Hao Lv,<sup>a,§</sup> Dongdong Xu,<sup>a,§</sup> Joel Henzie,<sup>b,c</sup> Ji Feng,<sup>d</sup> Aaron Lopes,<sup>e</sup> Yusuke Yamauchi,<sup>b,f,g,\*</sup> and Ben Liu<sup>a,\*</sup>

<sup>a</sup>Jiangsu Key Laboratory of New Power Batteries, Jiangsu Collaborative Innovation Center of Biomedical Functional Materials, School of Chemistry and Materials Science, Nanjing Normal University, Nanjing 210023, China

<sup>§</sup>H.L. and D.X. contributed equally to this work.

\*Email: ben.liu@nynu.edu.cn

<sup>b</sup>Key Laboratory of Eco-chemical Engineering, College of Chemistry and Molecular Engineering, Qingdao University of Science and Technology, Qingdao 266042, China

<sup>c</sup>International Center for Materials Nanoarchitectonics (WPI-MANA), National Institute for Materials Science (NIMS), 1-1 Namiki, Tsukuba, Ibaraki 305-0044, Japan

<sup>d</sup>Department of Chemistry, University of California, Riverside, California 92521, United States

<sup>e</sup>Department of Chemical Engineering, Massachusetts Institute of Technology, Cambridge, MA 02139, United States

<sup>f</sup>School of Chemical Engineering and Australian Institute for Bioengineering and Nanotechnology (AIBN), The University of Queensland, Brisbane, Queensland 4072, Australia

\*Email: y.yamauchi@uq.edu.au (Y. Yamauchi)

<sup>g</sup>Department of Plant & Environmental New Resources, Kyung Hee University, 1732 Deogyong-daero, Giheung-gu, Yongin-si, Gyeonggi-do 446-701, South Korea

## 1. Chemicals and Materials

Chloroauric acid ( $\text{HAuCl}_4$ ), silver nitrate ( $\text{AgNO}_3$ ), hexadecyltrimethylammonium Chloride (CTAC), dioctadecyldimethylammonium chloride (DODAC), and thiourea was purchased from Alfa Aesar. Hydrochloric acid, isopropanol, methanol, acetonitrile, hydrazine hydrate ( $\text{N}_2\text{H}_4$ , 50%), and diethyl ether were obtained from Sinopharm Chemical Reagent Co. Ltd. (Shanghai). 3-chloro-1-propanethiol was obtained from Sigma-Aldrich. N,N-dimethyldocosylamine was purchased from Heowns Opde Technologies (Tianjin). Behenyltrimethylammonium chloride ( $\text{C}_{22}\text{TAC}$ ) and N-(carboxymethyl)-N,N-dimethylheptadecan-1-aminium chloride ( $\text{C}_{22}\text{TACOOH}$ ) were synthesized according to our previously reported procedures.(S1) All the reagents were of analytical reagent grade and used without further purification.

## 2. Synthesis of $\text{C}_{22}\text{N-SH}$

In a typical synthesis of  $\text{C}_{22}\text{N-SH}$ , 7.5 g of N,N-dimethyldocosylamine (10 mM) and 2.2 g of 3-Chloro-1-propanethiol were totally mixed in 120 ml of acetonitrile and then refluxed under 95 °C for 24 h. After the removal of solvent by reduced pressure distillation, the crude product was washed with diethyl ether several times and dried in a vacuum oven overnight. The product of  $\text{C}_{22}\text{N-SH}$  was verified by  $^1\text{H}$  NMR (500 MHz,  $\text{CD}_3\text{OD}$ ):  $\delta$  3.15-3.04 (m, 1H), 2.97-2.84 (m, 2H), 2.71 (s, 6H), 1.64-1.67 (m, 2H), 1.27-1.39 (m, 44H), 0.89 (t,  $J = 7.1$  Hz, 3H), and  $^{13}\text{C}$  NMR (500 MHz,  $\text{CD}_3\text{OD}$ ):  $\delta$  59.46, 43.84 (2C), 33.10, 30.90 (15C), 30.69, 30.58, 30.51, 30.34, 27.73, 26.31, 23.77, 14.48.

**3. Au-4 and Au-70 nanoparticles:** solid Au-4 and Au-70 nanoparticles were synthesized according to previous reports.(S2, S3)

## Supporting References

- S1. D. Xu, X. Liu, H. Lv, Y. Liu, S. Zhao, M. Han, J. Bao, J. He, B. Liu, Ultrathin Palladium Nanosheets with Selectively Controlled Surface Facets. *Chem. Sci.* **9**, 4451-4455 (2018).
- S2. S. Pedireddy, H. K. Lee, W. W. Tjiu, I. Y. Phang, H. R. Tan, S. Q. Chua, C. Troadec, X. Y. Ling, One-Step Synthesis of Zero-Dimensional Hollow Nanoporous Gold Nanoparticles with Enhanced Methanol Electrooxidation Performance. *Nat. Commun.* **5**, 4947 (2014).
- S3. J. Fang, L. Zhang, J. Li, L. Lu, C. Ma, S. Cheng, Z. Li, Q. Xiong, H. You, A General Soft-Enveloping Strategy in the Templating Synthesis of Mesoporous Metal Nanostructures. *Nat. Commun.* **9**, 521 (2018).

## 6. Figures and Table

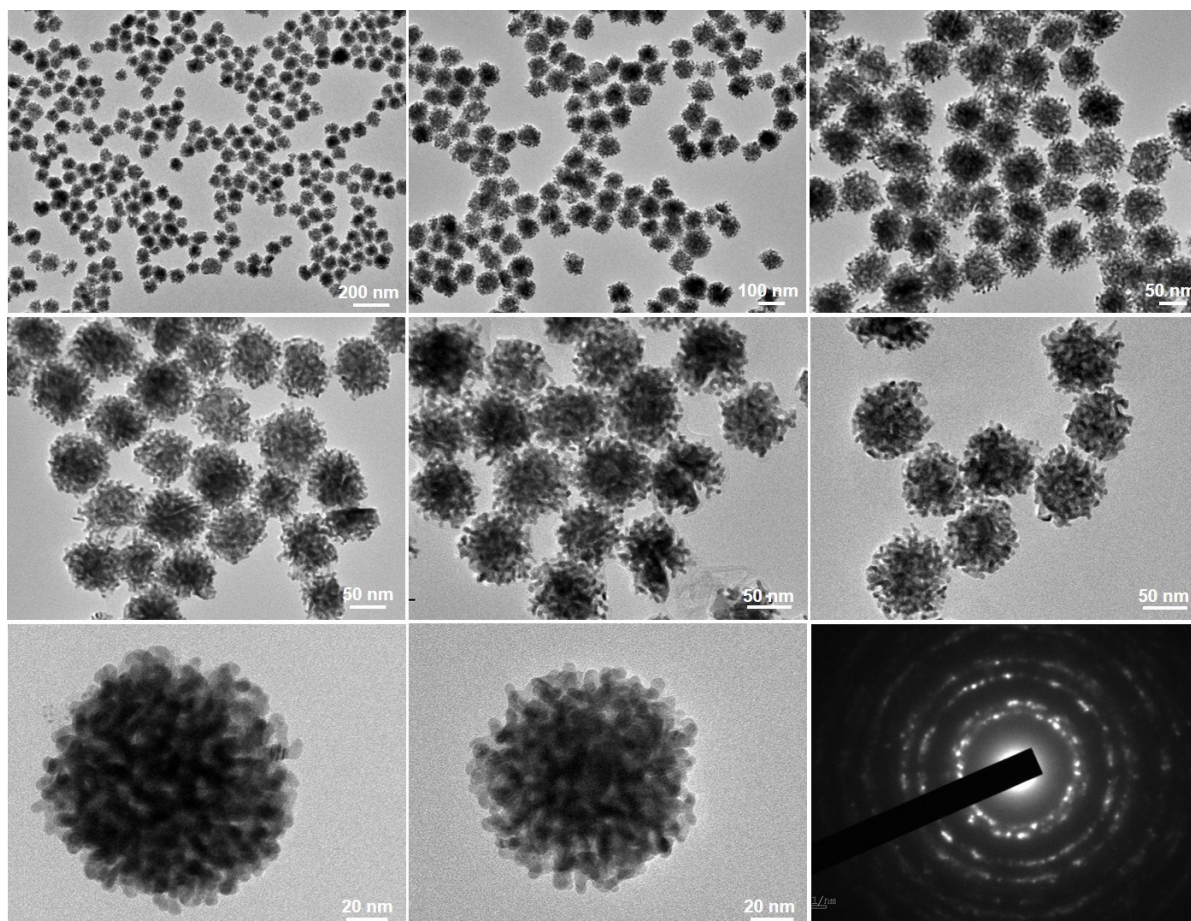

**Figure S1.** More TEM images of mesoAu-74 nanospheres with different magnifications. The results definitely exhibited the spherical shape with 3D interconnected mesochannels.

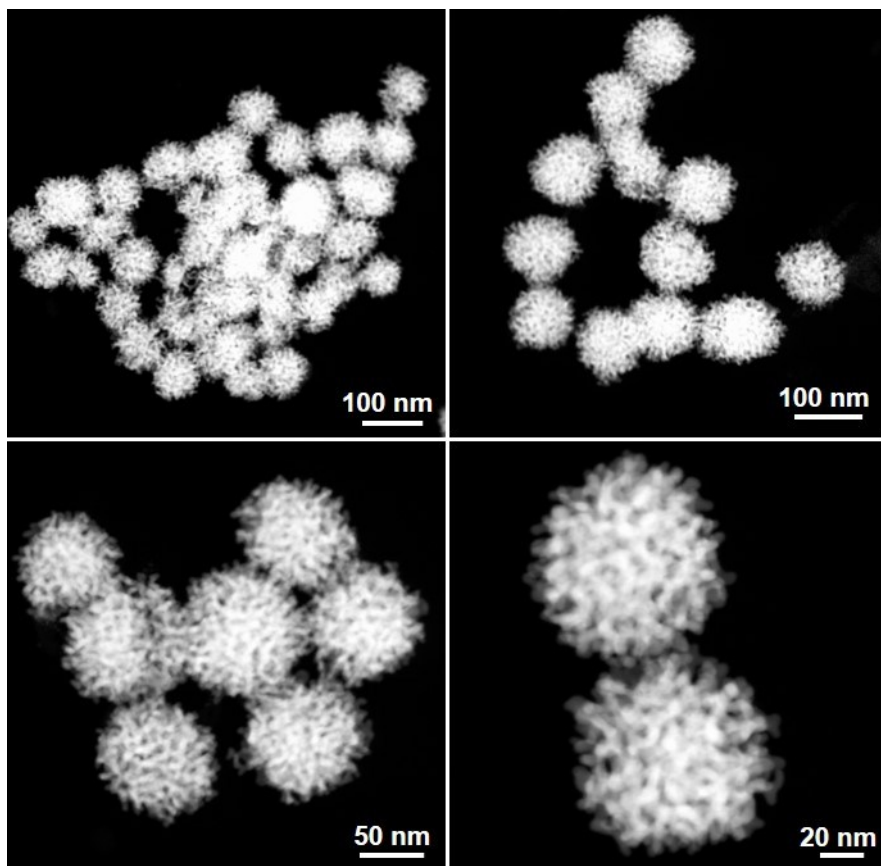

**Figure S2.** More HAADF-STEM images of mesoAu-74 nanospheres.

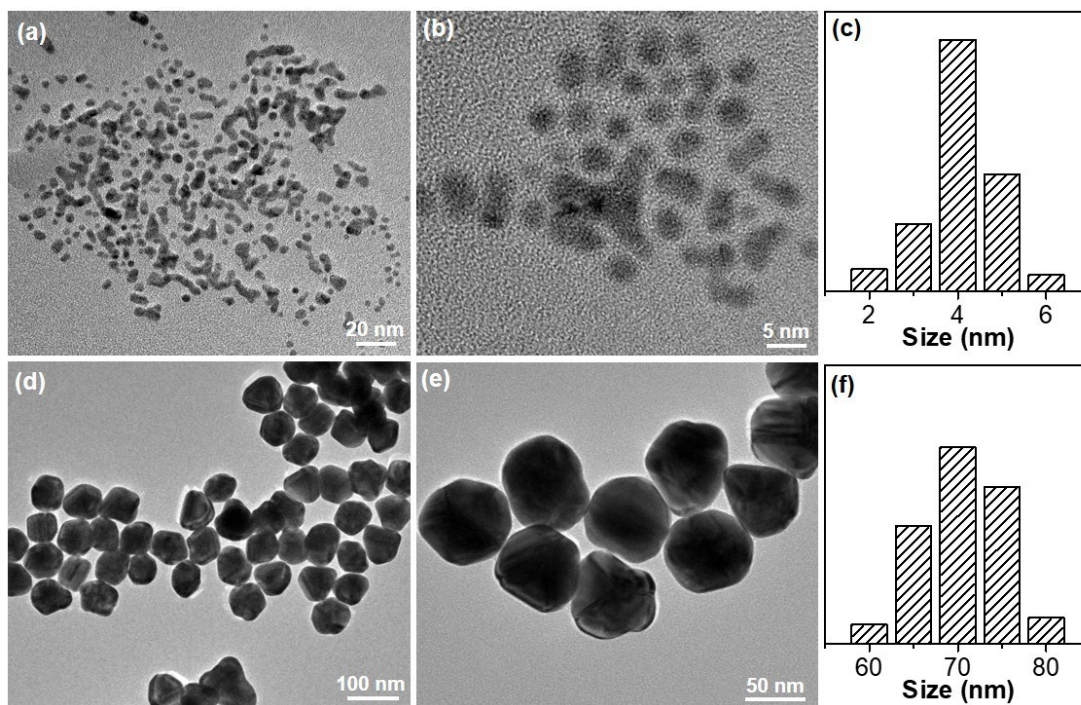

**Figure S3.** Structural characterizations of Au-4 and Au-70 bulk nanoparticles. TEM images and corresponding size distributions of (a-c) Au-4 and (d-f) Au-70 nanoparticles.



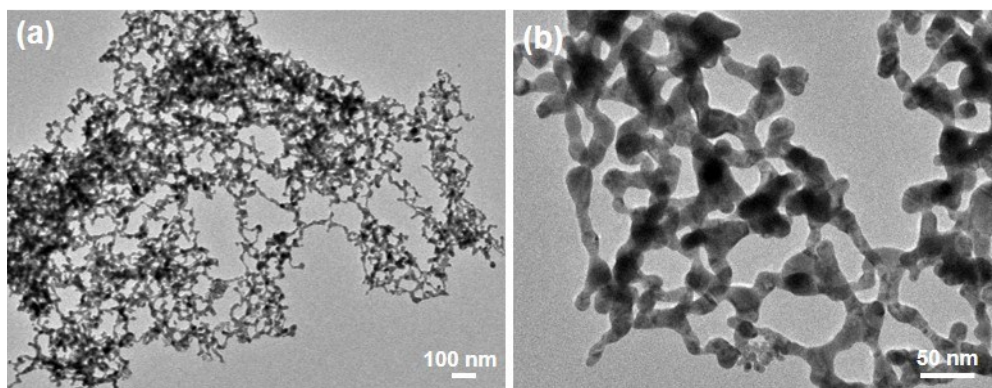

**Figure S4.** TEM of Au nanostructures synthesized in the absence of the surfactant.

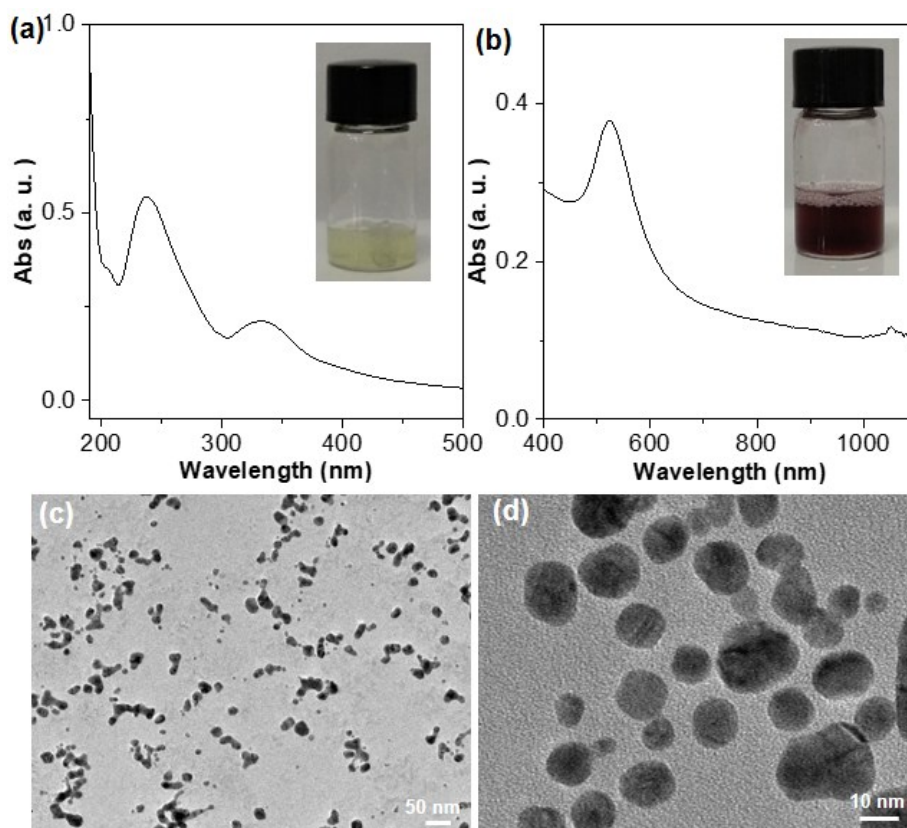

**Figure S5.** Au nanostructures synthesized with the surfactant of CTAC. UV-vis spectra of (a) solution of CTAC/HAuCl<sub>4</sub> and (b) resultant nanostructure, and (c, d) corresponding TEM images.

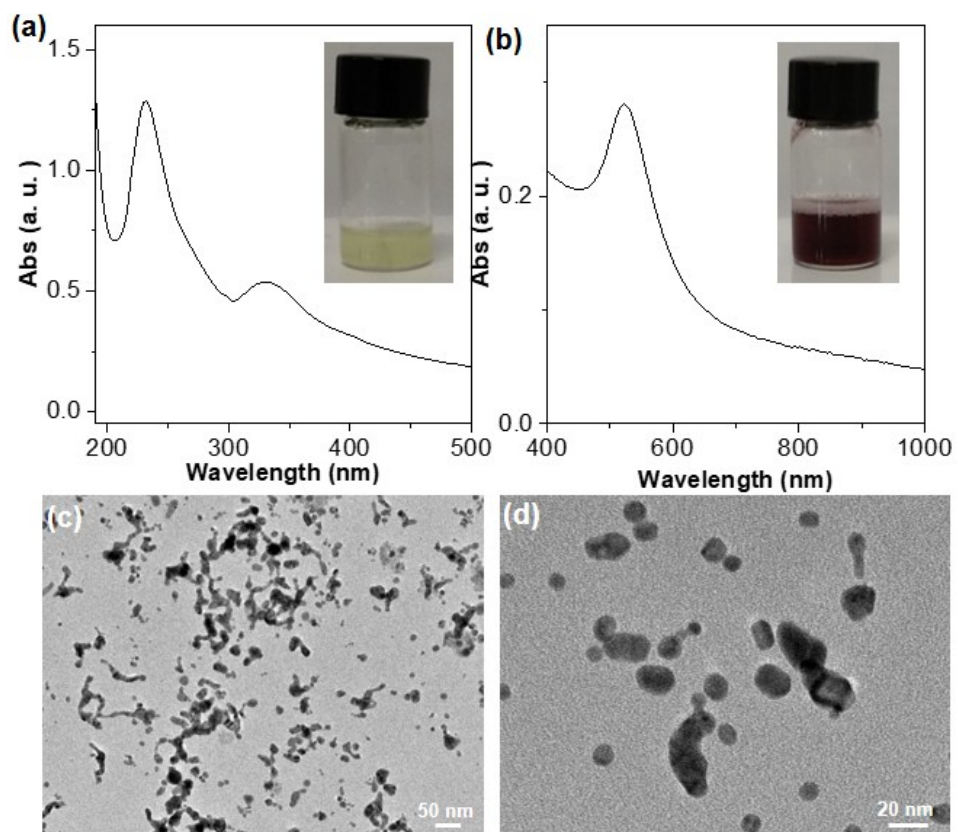

**Figure S6.** Au nanostructures synthesized with the surfactant of C<sub>22</sub>TAC. UV-vis spectra of (a) solution of C<sub>22</sub>TAC/HAuCl<sub>4</sub> and (b) resultant nanostructure, and (c, d) corresponding TEM images.

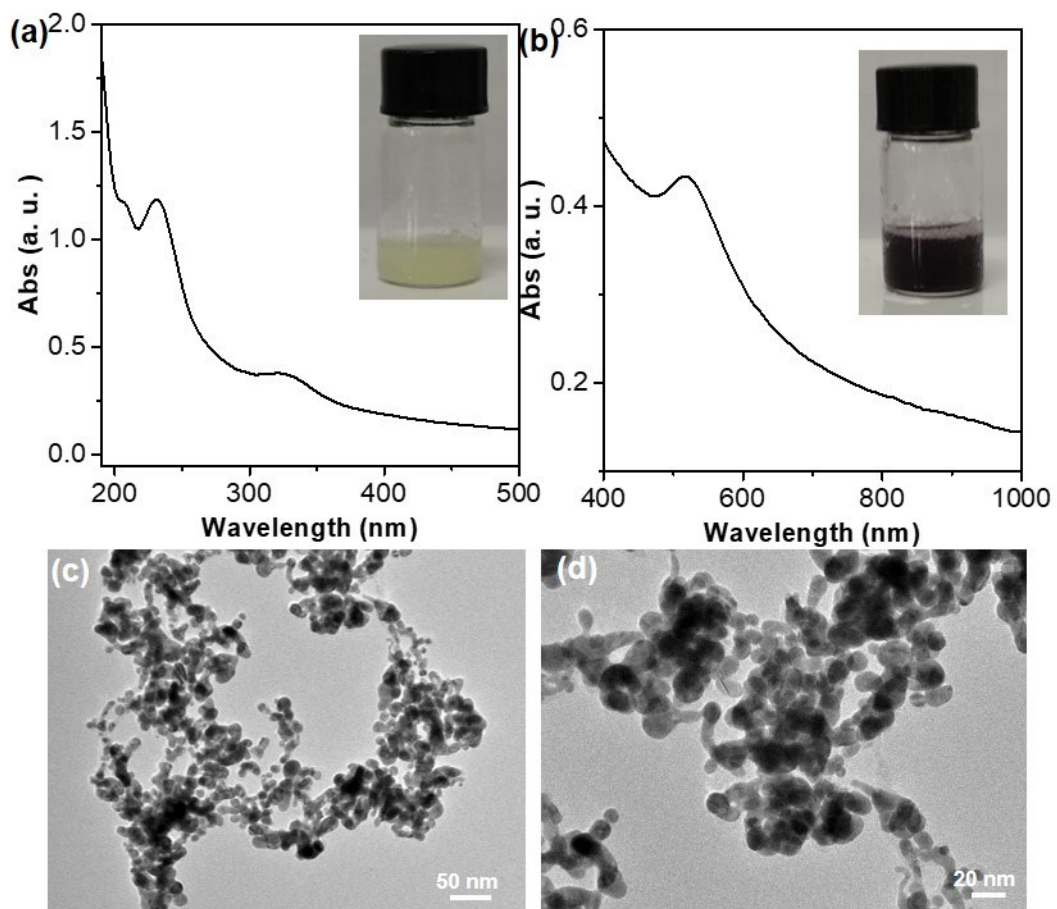

**Figure S7.** Au nanostructures synthesized with the surfactant of DODAC. UV-vis spectra of (a) solution of DODAC/HAuCl<sub>4</sub> and (b) resultant nanostructure, and (c, d) corresponding TEM images.



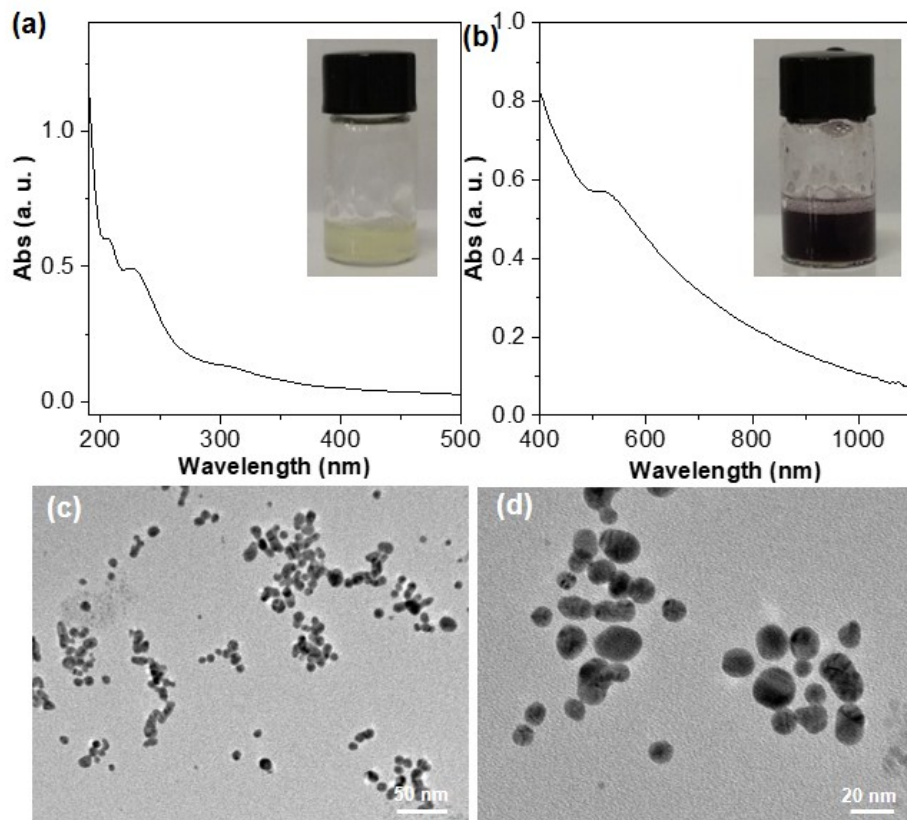

**Figure S8.** Au nanostructures synthesized with the surfactant of  $C_{22}TACOOH$ . UV-vis spectra of (a) solution of  $C_{22}TACOOH/HAuCl_4$  and (b) resultant nanostructure, and (c, d) corresponding TEM images.

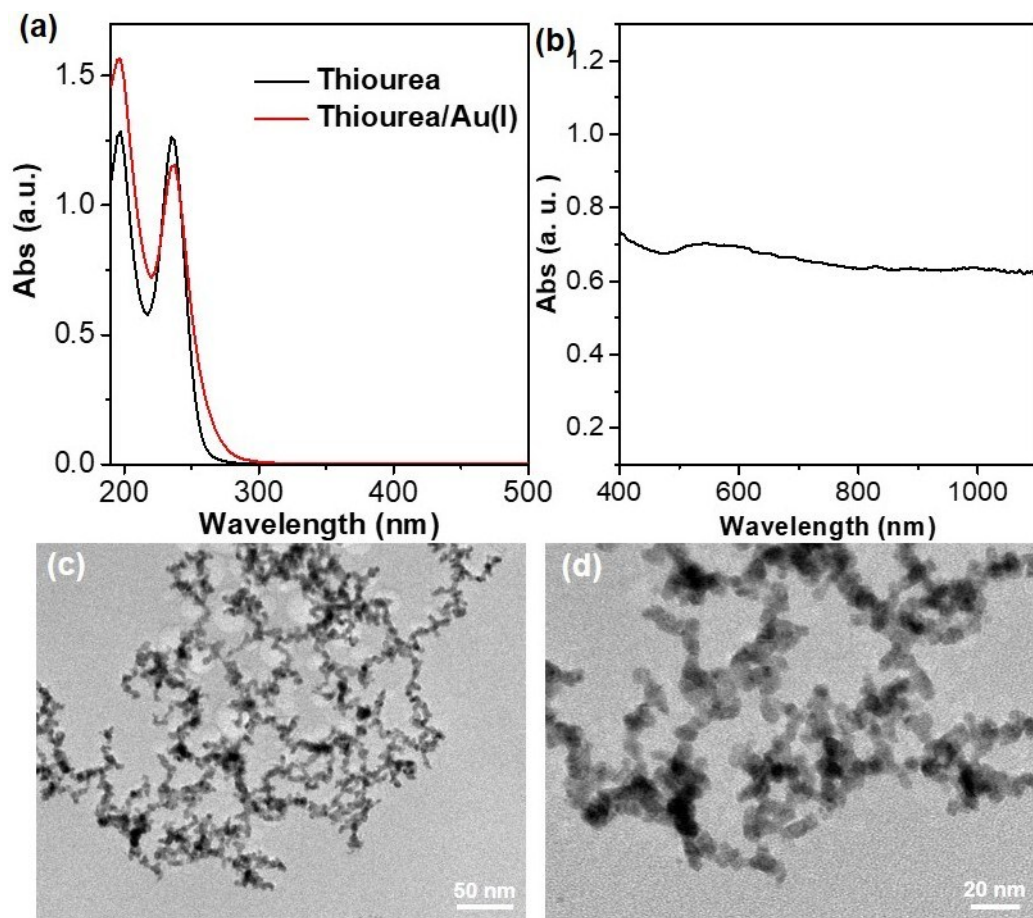

**Figure S9.** Au nanostructures synthesized with thiourea. UV-vis spectra of (a) the solution of thiourea/ $\text{HAuCl}_4$  and (b) resultant nanostructure, and (c, d) corresponding TEM images.

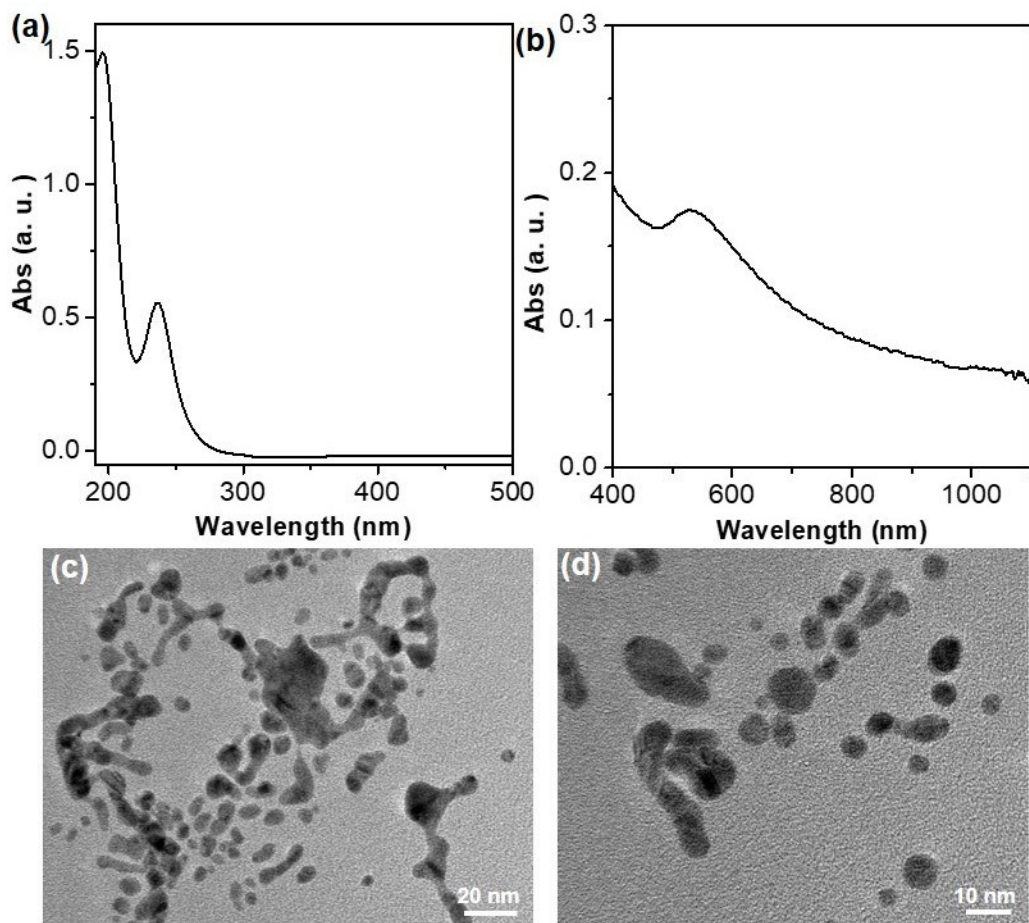

**Figure S10.** Au nanostructures synthesized with the mixed surfactants of thiourea and C<sub>22</sub>TAC. UV-vis spectra of (a) solution of thiourea/C<sub>22</sub>TAC/HAuCl<sub>4</sub> and (b) resultant nanostructure, and (c, d) corresponding TEM images.

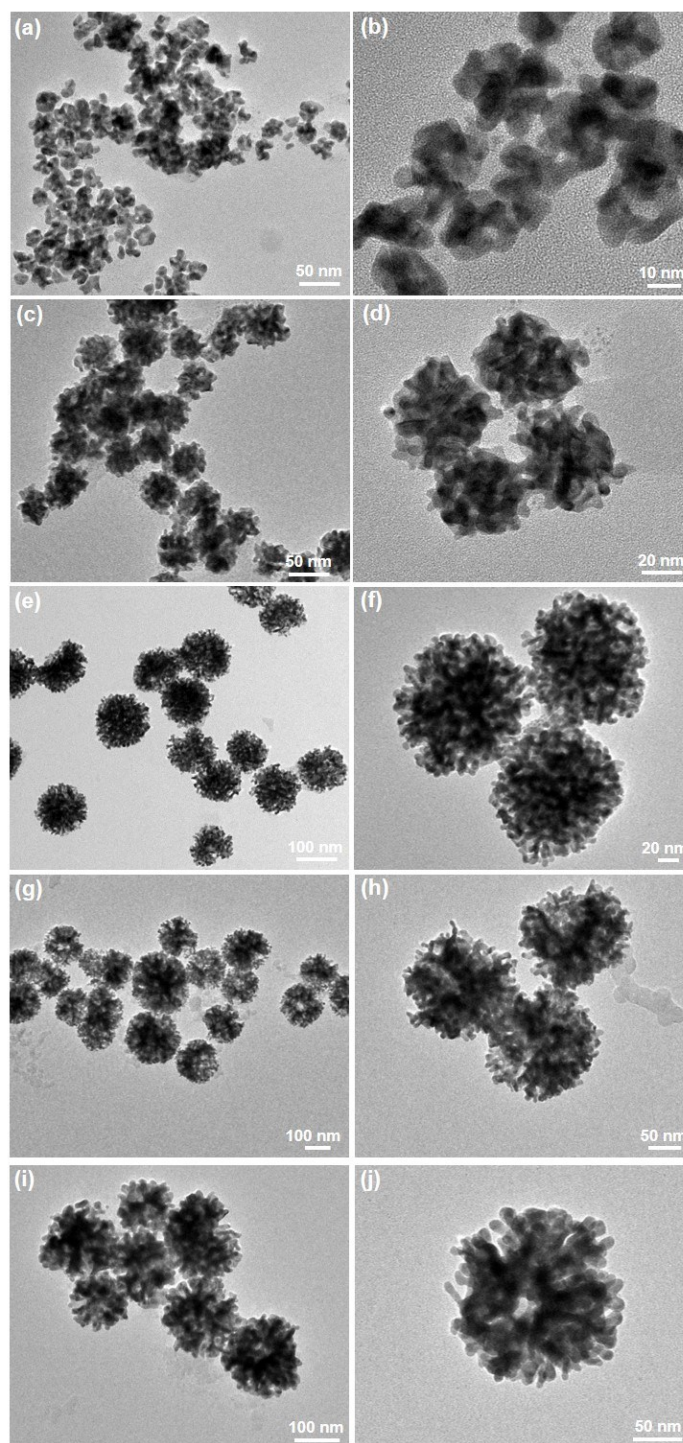

**Figure S11.** Synthesis of mesoAu nanospheres with different sizes and porosities under different reaction temperatures. TEM images of mesoAu nanospheres synthesized under the temperature of (a, b) 0 °C, (c, d) 25 °C, (e, f) 50 °C, (g, h) 75 °C, and (i, j) 95 °C.



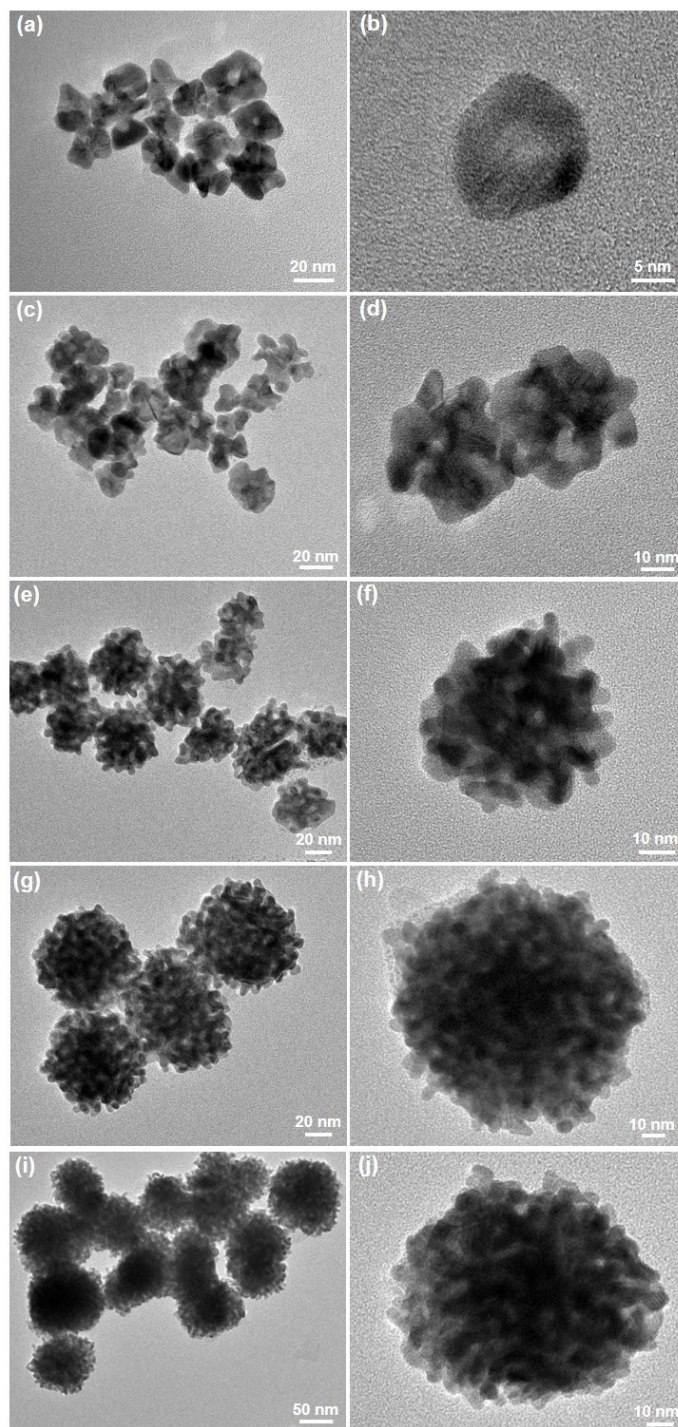

**Figure S12.** Synthesis of mesoAu nanospheres with different sizes and porosities under different pH at 25 °C. TEM images of mesoAu nanospheres synthesized under the pH of (a, b) 1.2, (c, d) 1.8, (e, f) 3.4, (g, h) 4.2, and (i, j) 4.8.



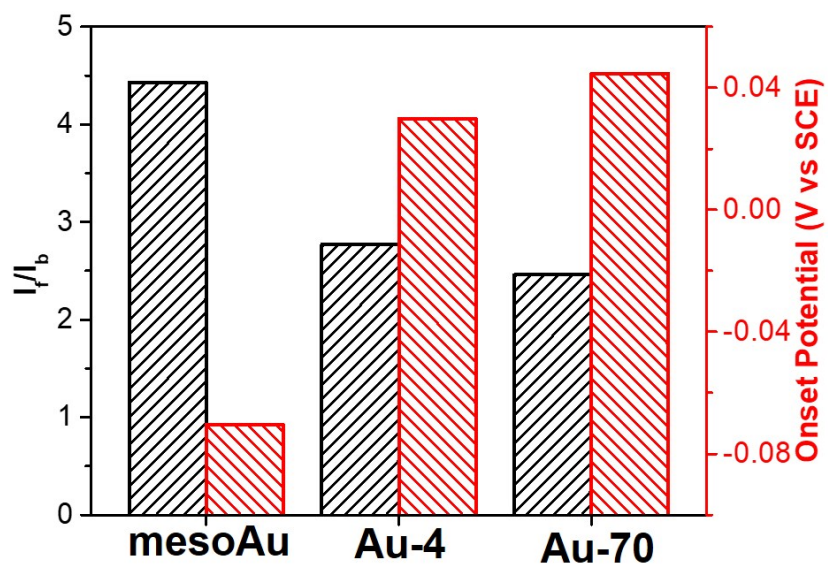

**Figure S13.** Summarized  $I_f/I_b$  values and onset potentials of the mesoAu nanospheres, non-porous Au-4 and Au-70 NPs.

**Table S1. Summarizations of the activity of nanostructured Au catalysts in the electrocatalytic MOR.**

| Nanocatalysts               | Measurement Conditions          |                             |              | Activity                                          |                                          | Ref.                                                      |
|-----------------------------|---------------------------------|-----------------------------|--------------|---------------------------------------------------|------------------------------------------|-----------------------------------------------------------|
|                             | Scan rate (mV s <sup>-1</sup> ) | CH <sub>3</sub> OH con. (M) | KOH con. (M) | Mass activity (μA μg <sup>-1</sup> ) <sup>a</sup> | Specific activity (mA cm <sup>-2</sup> ) |                                                           |
| mesoAu nanospheres          | 20                              | 2.0                         | 0.5          | 30.7                                              | 0.32                                     | This work                                                 |
| mesoAu network              | 10                              | 2.0                         | 0.5          | 13.1                                              | 0.21                                     | <i>Nat. Commun.</i> <b>2018</b> , 9, 521                  |
| Au nanobowls                | 10                              | 2.0                         | 0.5          | 26                                                | 0.09                                     | <i>Small</i> , <b>2016</b> , 12, 4531                     |
| Nanoporous Au               | 10                              | 1.0                         | 0.5          | 28                                                | 0.25                                     | <i>ACS Appl. Mater. Interfaces</i> <b>2016</b> , 8, 23920 |
| MesoAu film                 | 20                              | 2.0                         | 1.0          | -                                                 | 0.2                                      | <i>Nano Res.</i> <b>2016</b> , 9, 1752                    |
| Fern-like Au film           | 50                              | 1.0                         | 0.5          | -                                                 | 0.16                                     | <i>Electrochim. Acta</i> <b>2016</b> , 216, 88            |
| Nanoporous Au nanoparticles | 20                              | 2.0                         | 0.5          | 16.8                                              | 0.117                                    | <i>Nat. Commun.</i> <b>2014</b> , 5, 4947                 |
| Au nanoparticles on carbon  | 50                              | 1.0                         | 0.1          | ~21                                               | 0.14                                     | <i>Electrochim. Acta</i> <b>2013</b> , 94, 159            |
| Nanoporous Au film          | 10                              | 1.0                         | 0.5          | -                                                 | 0.11                                     | <i>J. Phys. Chem. C</i> <b>2007</b> , 111, 10382          |
| Au nanoparticles            | 50                              | 1.0                         | 1.0          | ~20                                               | 0.12                                     | <i>Electrochim. Acta</i> <b>2006</b> , 52, 1662           |

<sup>a</sup> No mass activity for Au films
